# Supplementary material
Source: PubMed Central journal article supplement (PMC5314727)
Supplement: Supp_Table1.pdf [file Supp_Table1.pdf]

## Supplementary Data

SUPPLEMENTARY TABLE S1. BIOLOGICAL PROCESS SIGNIFICANTLY ENRICHED USING DOWNREGULATED GENES

| <i>Biological process</i>                                          | <i>Count</i> | <i>p-Value</i>        |
|--------------------------------------------------------------------|--------------|-----------------------|
| GO:0048666 ~ neuron development                                    | 16           | $5.43 \times 10^{-5}$ |
| GO:0030182 ~ neuron differentiation                                | 18           | $8.80 \times 10^{-5}$ |
| GO:0031175 ~ neuron projection development                         | 13           | $1.81 \times 10^{-4}$ |
| GO:0035270 ~ endocrine system development                          | 7            | $3.24 \times 10^{-4}$ |
| GO:0030030 ~ cell projection organization                          | 15           | $4.58 \times 10^{-4}$ |
| GO:0048732 ~ gland development                                     | 9            | $4.77 \times 10^{-4}$ |
| GO:0030878 ~ thyroid gland development                             | 4            | $4.82 \times 10^{-4}$ |
| GO:0042445 ~ hormone metabolic process                             | 8            | $5.65 \times 10^{-4}$ |
| GO:0042446 ~ hormone biosynthetic process                          | 5            | $7.51 \times 10^{-4}$ |
| GO:0006821 ~ chloride transport                                    | 6            | $1.35 \times 10^{-3}$ |
| GO:0015698 ~ inorganic anion transport                             | 7            | $1.58 \times 10^{-3}$ |
| GO:0048858 ~ cell projection morphogenesis                         | 11           | $1.78 \times 10^{-3}$ |
| GO:0006928 ~ cell motion                                           | 16           | $1.91 \times 10^{-3}$ |
| GO:0042219 ~ cellular amino acid derivative catabolic process      | 4            | $1.98 \times 10^{-3}$ |
| GO:0048667 ~ cell morphogenesis involved in neuron differentiation | 10           | $2.09 \times 10^{-3}$ |
| GO:0032990 ~ cell part morphogenesis                               | 11           | $2.46 \times 10^{-3}$ |
| GO:0000902 ~ cell morphogenesis                                    | 13           | $3.19 \times 10^{-3}$ |
| GO:0007411 ~ axon guidance                                         | 7            | $3.21 \times 10^{-3}$ |
| GO:0010817 ~ regulation of hormone levels                          | 8            | $4.32 \times 10^{-3}$ |
| GO:0055114 ~ oxidation reduction                                   | 18           | $5.69 \times 10^{-3}$ |
| GO:0000904 ~ cell morphogenesis involved in differentiation        | 10           | $5.73 \times 10^{-3}$ |
| GO:0042135 ~ neurotransmitter catabolic process                    | 3            | $6.09 \times 10^{-3}$ |
| GO:0032989 ~ cellular component morphogenesis                      | 13           | $7.49 \times 10^{-3}$ |
| GO:0048812 ~ neuron projection morphogenesis                       | 9            | $8.20 \times 10^{-3}$ |
| GO:0051260 ~ protein homooligomerization                           | 6            | $9.12 \times 10^{-3}$ |
