# Supplementary material
Source: PubMed Central journal article supplement (PMC5314727)
Supplement: Supp_Table2.pdf [file Supp_Table2.pdf]

SUPPLEMENTARY TABLE S2. CELLULAR COMPONENTS SIGNIFICANTLY ENRICHED USING DOWNREGULATED GENES

| <i>Cellular components</i>                   | <i>Count</i> | <i>p-Value</i>        |
|----------------------------------------------|--------------|-----------------------|
| GO:0070161 ~ anchoring junction              | 12           | $4.05 \times 10^{-5}$ |
| GO:0005783 ~ endoplasmic reticulum           | 29           | $2.82 \times 10^{-4}$ |
| GO:0005912 ~ adherens junction               | 10           | $4.21 \times 10^{-4}$ |
| GO:0005911 ~ cell-cell junction              | 11           | $4.44 \times 10^{-4}$ |
| GO:0005886 ~ plasma membrane                 | 77           | $4.98 \times 10^{-4}$ |
| GO:0044459 ~ plasma membrane part            | 51           | $5.31 \times 10^{-4}$ |
| GO:0016323 ~ basolateral plasma membrane     | 11           | $7.44 \times 10^{-4}$ |
| GO:0030054 ~ cell junction                   | 18           | $1.40 \times 10^{-3}$ |
| GO:0043296 ~ apical junction complex         | 7            | $3.12 \times 10^{-3}$ |
| GO:0048471 ~ perinuclear region of cytoplasm | 12           | $3.16 \times 10^{-3}$ |
| GO:0016327 ~ apicolateral plasma membrane    | 7            | $3.62 \times 10^{-3}$ |
| GO:0019898 ~ extrinsic to membrane           | 16           | $5.46 \times 10^{-3}$ |
| GO:0005913 ~ cell-cell adherens junction     | 4            | $1.39 \times 10^{-2}$ |
