# Supplementary material
Source: PubMed Central journal article supplement (PMC5314727)
Supplement: Supp_Table3.pdf [file Supp_Table3.pdf]

SUPPLEMENTARY TABLE S3. INGENUITY PATHWAY ANALYSIS NETWORKS DATA

| ID | Molecules in network                                                                                                                                                                                                                                                                                                          | Score | Focus molecules | Top diseases and functions                                                                               |
|----|-------------------------------------------------------------------------------------------------------------------------------------------------------------------------------------------------------------------------------------------------------------------------------------------------------------------------------|-------|-----------------|----------------------------------------------------------------------------------------------------------|
| 1  | ABHD2, ABLIM1, ALDH, ALDH3A2, ALDH5A1, ANXA3, ASPM, ASS1, BCAT1, CLDN8, CLIC3, CLIC6, CXADR, DKK1, EPB41L5, ESRI, GPRASP1, GPM2, METTL7A, MME, Nuclear factor 1, PBK, PCP4, PLS1, PXDN, PYGL, SCAMP1, SEC63, SLC16A1, SORD, SYNE4, TCF/LEF, TWIST1, UBL3, YKT6                                                                | 54    | 32              | Cancer, cell death and survival, organismal injury and abnormalities                                     |
| 2  | ANLN, BEX2, BMP, BUB1B, CASC5, CCNB2, CENPA, CENPE, CENPI, CENPN, DIAPH3, E2F7, ETS, Fascin, FOXD1, FOXM1, GFPT2, GTSE1, HJURP, INF2, KIF23, KIF20A, KIF4A, NFKB (complex), NUF2, PPAP2B, PRC1, RACGAP1, RIPK4, SHCBP1, SHOX2, SLC7A5, SPC24, TPMT, ZMYND11                                                                   | 51    | 31              | Cell cycle, cellular movement, cellular assembly and organization                                        |
| 3  | alcohol group acceptor phosphotransferase, ANPEP, AURKA, BIRC5, BUB1, CCBE1, CDK1, CDKN3, CEP55, CTPS1, ERO1L, FAM83D, GALNT12, HGF, HMMR, HOXB7, HOXD10, LY75, MELK, MKI67, MRTO4, Mucin, NEK2, PBX1, PPL, RCOR3, RRM2, SELENBP1, SHISA2, SRPX2, STIL, STMN1, TMEM158, TRIP13, Vegf                                          | 50    | 32              | Cell cycle, cancer, organismal injury and abnormalities                                                  |
| 4  | AFAP1L2, ASAP1, c-Strc, CAV2, CDCA5, chymotrypsin, DOCK3, EPS8L1, ERK, EXOC6, Exocyst, FANCI, FARP1, Fgfr, FSCN1, Gap, GTPase, JAK, LAMTOR3, LTBPI, MAL, NCK, NEDD9, NEK6, OSMR, PEBP1, PKP4, PLAUR, RALA, RALGAP2, RALGPS1, RGL3, SDPR, SPINT2, UCK2                                                                         | 39    | 26              | Cellular movement, reproductive system development and function, cancer                                  |
| 5  | ABI2, ASAH1, ASF1A, CCNA2, CCNB1, CDC6, CDC45, CDK6, ELOVL7, H3F3A/H3F3B, Hat, HISTONE, histone deacetylase, Histone H1, Histone h3, HOPX, HOXB6, HPSE, ID2, Integrin alpha V beta 3, JADE1, LOXL2, MCM10, NAP1L2, ORC6, PAX8, PCMI, Pkc(s), PRR16, Rsk, SLC20A2, SOX6, SYNE2, UHRF1, WDHD1                                   | 39    | 27              | Connective tissue disorders, developmental disorder, gastrointestinal disease                            |
| 6  | Adaptor protein 1, AP1M2, Ap2 alpha, atypical protein kinase C, CD200, CDCA8, DAB2, DAPK2, Dynamin, farnesyl transferase, FBLIM1, GAS2L3, GNA15, HOXC6, Intersectin, ITSN2, Jnk, JUN/JUNB/JUND, KIF2C, LMO3, MEGF10, MTHFD2, MYLIP, MYO5B, NPC1, NRAS, OIP5, PDCD4, Plc beta, SGOL2, Sos, SPC25, SRD5A1, TRIB3, TRIO          | 37    | 25              | Cellular assembly and organization, dna replication, recombination, and repair, cellular development     |
| 7  | Akt, ANGPTL1, ARHGAP44, BANK1, BMP7, CADM1, CDH13, COL12A1, COL5A1, COL5A3, COL6A1, COL6A2, COL7A1, collagen, Collagen type III, Collagen type IV, Collagen type V, Collagen type VI, CPE, DDR1, HNI, Hsp27, MAL2, N-Cadherin, NELL2, PARM1, Pdgf Ab, PDGF-AA, PTPRN2, Raf, SCD5, SERPINH1, SMOOTH MUSCLE ACTIN, TPD52, VGLL3 | 33    | 23              | Connective tissue disorders, dermatological diseases and conditions, organismal injury and abnormalities |
| 8  | ADA, AK4, AMPK, CENPE, CLIC4, DIO2, DNMI1, Eph Receptor, EPHA4, FOXE1, FOXL1, GLCCII, Hedgehog, HHEX, MAP4K4, Mapk, MHC Class II (complex), MIR124, NCAPG, NDPK, NKX2-1, NME5, NME7, Pde, PDE1A, PDE8B, PLC gamma, Proinsulin, Rab5, SLIT3, SORL1, TG, TSH, TSPAN7, UNC5C                                                     | 33    | 23              | Developmental disorder, endocrine system disorders, hereditary disorder                                  |
| 9  | ADAM12, ANK3, APC (complex), BTC, Cdc2, CDC20, Cdc25, CDC25C, Cdk, CDS1, CHEK1, Cyclin A, Cyclin B, DLGAP5, E2f, GINS1, GOLTI1B, growth factor receptor, IGF2BP3, KIF11, KIF15, MAD2L1, MAOA, MARCKS, Mpf, NUSAP1, PI3K (complex), PI3K p85, PRR11, RAB3B, RNF180, SH3PXD2B, TPX2, TTK, UBE2C                                 | 29    | 24              | Cell cycle, cancer, organismal injury and abnormalities                                                  |
| 10 | AIFIL, ALDH1A3, AMD1, AUNIP, C18orf54, C2orf40, CASD1, CCND1, CENPH, CIRBP, DEPDC1, DIRAS3, ELAVL1, EPB41L4B, FECH, FGFR1OP2, FKBP14, FRMD8, GAS2L3, GPDIL, GRAMD3, HTATIP2, IGIP, KIF20B, KLHDC1, LDLRAD3, MYO5C, NFIC, PAPOLA, PCBPI, RRM2, SERINC3, TFPI, TMED4, ZEB2                                                      | 27    | 20              | Tissue development, cancer, organismal injury and abnormalities                                          |

(continued)

SUPPLEMENTARY TABLE S3. (CONTINUED)

| <i>ID</i> | <i>Molecules in network</i>                                                                                                                                                                                                                                                                                             | <i>Score</i> | <i>Focus molecules</i> | <i>Top diseases and functions</i>                                                                                  |
|-----------|-------------------------------------------------------------------------------------------------------------------------------------------------------------------------------------------------------------------------------------------------------------------------------------------------------------------------|--------------|------------------------|--------------------------------------------------------------------------------------------------------------------|
| 11        | BEND7, BRIP1, C/ebp, caspase, Cbp/p300, CD24, CENPW, CIRBP, Cyclin D, CYP39A1, DEPDC1, DSP, ELOVL6, estrogen receptor, Focal adhesion kinase, FOSL1, Hdac, Histone h4, HSD17B6, Hsp70, Hsp90, IQGAP3, KPNA2, MUC15, N-cor, PAX6, Pro-inflammatory Cytokine, RAD51, Rb, RORA, RPA, Rxr, SMARCA2, thymidine kinase, TOP2A | 24           | 19                     | DNA replication, recombination, and repair, cancer, organismal injury and abnormalities                            |
| 12        | ACADL, ACADVL, ATP11C, ATP1B1, ATP5EP2, ATP8A1, ATP8B1, ATP8B2, CDS2, CLN5, CPVL, CTNNA1, HID1, KIF14, KIF18A, KIF1BP, LONP1, P3H1, PAIP1, PAIP2, PAPOLA, PRC1, PRUNE2, RASSF8, RBMS1, RCN3, SCAPER, SHMT1, SLC25A22, SLC36A1, SVIP, TM7SF2, TMEM30A, TOR1A, UBC                                                        | 23           | 18                     | Lipid metabolism, molecular transport, small molecule biochemistry                                                 |
| 13        | ANGPTL2, ARG2, Caveolin, CHN2, CLIP2, CLU, creatine kinase, CSPG4, ENAH, ERK1/2, Growth hormone, HDL, HDL-cholesterol, hemoglobin, Ldh (complex), LDL, LDL-cholesterol, LILRB2, LIPG, LRP, NFIA, Nos, Nr1h, PCYOX1, PI3K (family), PLTP, PRKAA, PSRC1, RGN, RGS5, Sphk, STAB1, TRIB1, TRIM2, VLDL-cholesterol           | 22           | 18                     | Embryonic development, nervous system development and function, organ development                                  |
| 14        | ACTN1, Calcineurin protein(s), calpain, Cdc25B/C, CDH1, CFLAR, Cg, Ck2, Cyclin E, cytochrome C, DTL, EPCAM, EPHX2, EPM2AIP1, FSH, GALNT6, Gsk3, ID4, IFT57, ITCH, Lh, NFAT (complex), NMDA Receptor, OCLN, PARP, PARP8, phosphatase, PP1-C, PPFIBP2, PTPN13, PTPRM, SIRPA, Smad1/5/8, Sod, TCF                          | 21           | 17                     | Cell morphology, cell-to-cell signaling and interaction, connective tissue development and function                |
| 15        | ACOT7, ADAMI9, ADAMTS12, ADCY, ADCY9, ADRB, Alpha catenin, Cadherin, CaMKII, CD209, CDCA3, Creb, CSF1R, ESRP1, FAM214A, Fgf, FGFR2, Gm-csf, Ikk (family), IL1, IRAK1, ITGA5, MAGEA3/MAGEA6, Mek, Mic, NTRK2, PDGFRA, PPI protein complex group, PPP1R14C, Ras, Rock, SACS, Sapk, STAT5a/b, TGM2                         | 20           | 18                     | Cancer, organismal injury and abnormalities, skeletal and muscular system development and function                 |
| 16        | APP, ATL3, ATP4A, C11orf52, C11orf71, CAAP1, CDH3, CDKL2, CSF1R, CTNNA1, CTNND1, DNAH1, DNAH14, DNALI1, DYNLT1, EPB41L4A, EYA4, FZD4, GDF15, KIF3B, LRP5, NANOS1, NDP, ODF1, ODF2, PPAP2B, RAPIB, RASGRF1, RSPH1, SIX2, SKA3, SPC24, TCP11L1, TSPAN12, ZSCAN18                                                          | 19           | 17                     | Hereditary disorder, ophthalmic disease, organismal injury and abnormalities                                       |
| 17        | BDH2, C19orf25, CD151, COG7, COLGALT1, ERP44, FAM72A, KIF18B, KLC4, KLHL7, KNTC1, LPCAT1, LPCAT2, LRRC16A, MIS18A, MRPL1, NBAS, NCDN, NNAT, PHF20L1, PNISR, PNN, RBM47, SCFD2, SH3BGR2, SLC16A9, SPDL1, STXBP6, TAZ, UBC, ZDHHC2, ZNF415, ZNF471, ZW10, ZWILCH                                                          | 19           | 16                     | Cell cycle, cell morphology, cellular assembly and organization                                                    |
| 18        | ADRB2, BARX2, BEX4, CALM1 (includes others), CCDC8, CKAP2L, CLMP, CREB1, DEPDC7, DMXL1, EGFR, ELAVL1, ENOSF1, EPAS1, FAM169A, FHL2, GTF2B, ID3, IQCA1, ISG15, KMT2D, KRTPCAP3, LMNA, NT5DC1, NXF1, POT1, RASEF, SATB1, TCERGIL, TM9SF3, UBC, UNC93B1, ZBED2, ZNF540, ZNF626                                             | 19           | 16                     | Gene expression, cellular assembly and organization, RNA damage and repair                                         |
| 19        | ADAM29, ADAMTS6, BEX5, C9orf3, CCDC176, CCL23, CD163L1, CREBRF, ECT2, ENO1, ENTPD2, FAM189A2, FANK1, GALNT18, GBPI, GGH, HS3ST3A1, IFNG, JUN, KANSL1L, LIG4, Metalloprotease, NFKBID, OPTN, OXRI, PDX1, RNA polymerase II, SAA1, SMARCA4, TMEM50B, TNFSF11, TSHR, TSPAN8, UPF2, VRK1                                    | 19           | 16                     | Cell morphology, connective tissue development and function, skeletal and muscular system development and function |

(continued)

SUPPLEMENTARY TABLE S3. (CONTINUED)

| <i>ID</i> | <i>Molecules in network</i>                                                                                                                                                                                                                                                                                                                | <i>Score</i> | <i>Focus molecules</i> | <i>Top diseases and functions</i>                                                                   |
|-----------|--------------------------------------------------------------------------------------------------------------------------------------------------------------------------------------------------------------------------------------------------------------------------------------------------------------------------------------------|--------------|------------------------|-----------------------------------------------------------------------------------------------------|
| 20        | ACSS3, AT1L2, BRD8, CLCA2, DEF6, DUOXA1, EPCAM, HNF4A, KIAA0101, mir-140, mir-205, miR-1285-3p (and other miRNAs w/seed CUGGGCA), MOCOS, MSRB1, MTCL1, NPNT, PDIA5, PGM3, PODXL, REEP5, RNASE4, SH3BGR2, SH3YL1, SOGA1, SPATA6, TMC4, TMC04, TMEM245, TP53, TRIM28, UROD, VIM, ZNF10, ZNF302, ZSWIM5                                       | 18           | 16                     | Cancer, endocrine system disorders, organismal injury and abnormalities                             |
| 21        | ATXN1, CPQ, CREB1, ECM1, EPCAM, ESRP1, ETV3, FABP2, FOXE1, FUT7, GPR83, IL10RA, KIAA1549L, KRT7, LRG1, LRIG3, MGAT4C, NFIB, PDGFR, prostaglandin E1, RBMS3, RMST, SLC6A13, SOX2, STAC2, TG, TGFB1, TMEM30B, TNFRSF14, TSC22D1, USP34, USP54, VEPH1, WISP1, WNT3                                                                            | 18           | 15                     | Endocrine system development and function, small molecule biochemistry, embryonic development       |
| 22        | Adaptor protein 2, ADGRD1, ADGRE2, ADGRF1, ADGRG1, ADORA3, ADORA2B, C5AR1, CCR1, CELSR2, chemokine, Clathrin, FZD5, G protein, G protein alpha, Gpr, GPR84, GPRC5A, IKK (complex), IL12 (family), LMBRD1, Metalloprotease, MTORC1, p85 (pik3r), PHF10, PLC, PTGER, Rac, Ras homolog, Relaxin, Sfk, She, SRC (family), STAT, TSHR           | 17           | 16                     | Carbohydrate metabolism, small molecule biochemistry, hematological system development and function |
| 23        | Alp, Alpha Actinin, CAT, Collagen Alpha1, Collagen type I, Collagen type II, Collagen(s), CREB3L1, CROT, DUOX2, Ecm, Fc gamma receptor, Fibrin, FRZB, Integrin, Laminin, LOX, Mmp, MMP1, NPNT, P38 MAPK, PARVB, Pdgf (complex), PDGF BB, Kar, SATB2, secreted MMP, SERPINE1, Smad, SMAD6, TFP2, Tgf beta, TGFB1, TIMP2, trypsin            | 17           | 15                     | Cellular movement, cardiovascular disease, organismal injury and abnormalities                      |
| 24        | ARVCF, CA8, CEMIP, CTNND1, CTNND2, CYB5D1, CYBRD1, DCUN1D1, DNAJB4, ENCL1, ENPP5, EPAS1, EPCAM, FAMI26A, FER, HIF1A, HILPDA, HSD17B8, HSP90AA1, Igfbp, IGFBP2, IQCK, KDM3A, KLHL14, LNX1, LOXL2, MARCKSL1, PKP4, PTPRU, RAD21, SCRIB, SLCO2A1, TMEM45A, tretinoin, WNT10B                                                                  | 15           | 15                     | Cellular function and maintenance, cellular development, cellular growth and proliferation          |
| 25        | 14-3-3, Alpha tubulin, Angiotensin II receptor type 1, BCR (complex), CLDN3, CYLD, DKK3, Dynein, F Actin, Fcer1, G protein alpha, Gamma tubulin, KCNJ16, MAATS1, MAP2K1/2, Nfat (family), NR3C2, Pka, PLD1, PP2A, PPP1R9A, PROCR, Ptk, PTPase, RAB32, Rap1, SNTB1, SNX1, SNX5, TCR, TUBB2A, tubulin (complex), tyrosine kinase, UBE2S, Wnt | 15           | 15                     | Cell morphology, cellular assembly and organization, cell death and survival                        |
